# Supplementary material
Source: PubMed Central journal article supplement (PMC1766387)
Supplement: rspb20063747s12.pdf [file rspb20063747s12.pdf]

ELECTRONIC SUPPLEMENTARY MATERIAL

Table S1. BLAST analysis of non-microsatellite nucleotide sequences retrieved from archaeological maize specimens (last update January 2005).

| Primers used         | Samples |                |            | Amplification products |               |                                                                                     |         |                                                                                         |         |                                                                        |         |
|----------------------|---------|----------------|------------|------------------------|---------------|-------------------------------------------------------------------------------------|---------|-----------------------------------------------------------------------------------------|---------|------------------------------------------------------------------------|---------|
|                      | ID      | Type of remain | Race       | Size (bp)              | No. of clones | BLASTN                                                                              | E-value | BLASTX                                                                                  | E-value | TBLASTX                                                                | E-value |
| <u><i>Phi127</i></u> |         |                |            |                        |               |                                                                                     |         |                                                                                         |         |                                                                        |         |
|                      | T.C.54  | cob            | NA         | 226                    | 2             | NS                                                                                  |         | NM                                                                                      | -       | NS                                                                     |         |
|                      | T.C.54  | cob            | NA         | 92                     | 3             | NS                                                                                  |         | <i>Bacillus halodurans</i><br>C-125/ alpha-L-arabinosidase<br><a href="#">NP_242740</a> | 4exp-6  | <i>Bacillus halodurans</i><br><a href="#">BA000004</a>                 | 7exp-8  |
|                      | LH38    | kernel         | Morocho    | 128                    | 1             | Zea mays clone C9 retrotransposon<br>Huck1 gag/pol gene<br><a href="#">AF464767</a> | 5exp-33 | <i>Zea mays</i> gag/pol protein<br><a href="#">AAM22642</a>                             | 9exp-10 | Zea mays unknown<br><a href="#">AY530950.</a>                          | 8e-13   |
|                      | LH40    | kernel         | Chaucha    | 128                    | 2             | Zea mays clone C9 retrotransposon<br>Huck1 gag/pol gene<br><a href="#">AF464767</a> | 8exp-38 | <i>Zea mays</i> gag/pol protein<br><a href="#">AAM22642</a>                             | 9exp-10 | <i>Zea mays</i> chromosome 4 clone BAC 072<br><a href="#">AF528565</a> | 1exp-15 |
|                      | LH20    | kernel         | Pisingallo | 128                    | 1             | Zea mays clone C9 retrotransposon                                                   | 3exp-35 | <i>Zea mays</i> gag/pol protein                                                         | 9exp-10 | <i>Zea mays</i> chromosome 4                                           | 1exp-15 |

|               |        |            |     |   |                                                                                                                      |         |                                                                                                  |                          |                                                                                                                    |         |
|---------------|--------|------------|-----|---|----------------------------------------------------------------------------------------------------------------------|---------|--------------------------------------------------------------------------------------------------|--------------------------|--------------------------------------------------------------------------------------------------------------------|---------|
| LH20          | kernel | Pisingallo | 110 | 2 | Huck1 gag/pol gene<br><a href="#">AF464767</a><br><i>Zea mays</i> Zeon-1<br>retroelement<br><a href="#">AF090447</a> | 6exp-26 | NM                                                                                               | <a href="#">AAM22642</a> | clone BAC 072<br><a href="#">AF528565</a><br><i>Zea mays</i><br>Zeon-1<br>retroelement<br><a href="#">AF090447</a> | 8exp-6  |
| LH39          | kernel | Chaucha    | 95  | 1 | NS                                                                                                                   |         | NM                                                                                               |                          | NS                                                                                                                 |         |
| LH20          | kernel | Pisingallo | 111 | 1 | Hawaiian green turtle<br>herpesvirus<br><a href="#">AF035003</a>                                                     | 1exp-9  | NM                                                                                               |                          | NM                                                                                                                 |         |
| LH20          | kernel | Pisingallo | 85  | 1 | NS                                                                                                                   |         | NM                                                                                               |                          | NM                                                                                                                 |         |
| LH22          | kernel | Capia      | 110 | 6 | NS                                                                                                                   |         | NM                                                                                               |                          | NS                                                                                                                 |         |
| P.C.15        | cob    | Pisingallo | 129 | 1 | NS                                                                                                                   |         | <i>Aspergillus</i><br><i>nidulans</i><br>hypothetical<br>protein<br><a href="#">EAA57997</a> .   | 4exp-6                   | <i>Aspergillus</i><br><i>nidulans</i><br>predicted mRNA<br><a href="#">XM 410348</a>                               | 7e-08   |
| P.C.15        | cob    | Pisingallo | 134 | 6 | NS                                                                                                                   |         | NM                                                                                               |                          | NS                                                                                                                 |         |
| P.C.15        | cob    | Pisingallo | 136 | 2 | NS                                                                                                                   |         | NS                                                                                               |                          | NS                                                                                                                 |         |
| P.C.13        | cob    | Capia      | 116 | 1 | NS                                                                                                                   |         | NS                                                                                               |                          | NS                                                                                                                 |         |
| P.C.13        | cob    | Capia      | 111 | 7 | NS                                                                                                                   |         | NM                                                                                               |                          | NS                                                                                                                 |         |
| <u>Phi029</u> |        |            |     |   |                                                                                                                      |         |                                                                                                  |                          |                                                                                                                    |         |
| T.C.7         | cob    | NA         | 207 | 7 | NS                                                                                                                   |         | <i>Cytophaga</i><br><i>hutchinsonii</i><br>Predicted<br>epimerase<br><a href="#">ZP_00311149</a> | 7exp-11                  | <i>Pseudomonas</i><br><i>putida</i><br>arylsulfonate<br>desulfonation<br>gene                                      | 3exp-11 |

[AF126200](#)

|               |     |                     |     |    |      |                                                                          |                                                                                        |        |                                                                                  |        |
|---------------|-----|---------------------|-----|----|------|--------------------------------------------------------------------------|----------------------------------------------------------------------------------------|--------|----------------------------------------------------------------------------------|--------|
| T.C. 7        | cob | NA                  | 157 | 5  | NS   |                                                                          | NM                                                                                     |        | NS                                                                               |        |
| T.C. 27       | cob | NA                  | 119 | 1  | NS   |                                                                          | NM                                                                                     |        | NS                                                                               |        |
| T.C. 27       | cob | NA                  | 128 | 8  | NS   |                                                                          | <i>Mannheimia succiniciproducens</i> secA protein<br><a href="#">YP_087519</a>         | 1exp-4 | <i>Mannheimia succiniciproducens</i> complete genome<br><a href="#">AE016827</a> | 6exp-6 |
| P.C. 13B      | cob | Capia               | 248 | 2  | NS   |                                                                          | NS                                                                                     |        | NS                                                                               |        |
| P.C. 14       | cob | Capia               | 131 | 7  | NS   |                                                                          | NM                                                                                     |        | <i>Zea mays</i> triosephosphate isomerase 1 gene<br><a href="#">L29431</a>       | 2exp-3 |
| P.C. 15       | cob | Pisingallo          | 98  |    | D.S. | <i>Leishmania brasiliensis</i> Genomic clone<br><a href="#">BX905934</a> |                                                                                        | 4exp-4 | NM                                                                               | NS     |
| <u>Phi059</u> |     |                     |     |    |      |                                                                          |                                                                                        |        |                                                                                  |        |
| T.C. 56       | cob | NA                  | 156 | 1  | NS   |                                                                          | NM                                                                                     |        | NS                                                                               |        |
| T.C. 56       | cob | NA                  | 167 | 10 | NS   |                                                                          | <i>Dechloromonas aromatica</i> Methylmalonyl-CoA mutase<br><a href="#">ZP_00152997</a> | 2exp-5 | <i>Nocardia farcinica</i> complete genome<br><a href="#">AP006618</a>            | 2exp-5 |
| T.C. 55       | cob | Blanco y ocho rayas | 167 | 7  | NS   |                                                                          | <i>Dechloromonas aromatica</i> Methylmalonyl-CoA mutase<br><a href="#">ZP_00152997</a> | 6exp-6 | <i>Nocardia farcinica</i> complete genome<br><a href="#">AP006618</a>            | 6exp-6 |

|             |        |         |     |      |                                                                                                          |         |                                                                                                        |                                                                                                                    |         |
|-------------|--------|---------|-----|------|----------------------------------------------------------------------------------------------------------|---------|--------------------------------------------------------------------------------------------------------|--------------------------------------------------------------------------------------------------------------------|---------|
| T.C. 27Bcob | NA     |         | 104 | D.S. | <i>Streptomyces coelicolor</i> complete genome<br><a href="#">AL939115</a>                               | 1exp-17 | NS                                                                                                     |                                                                                                                    | NS      |
| T.C. 27Bcob | NA     |         | 154 | 1    | NS                                                                                                       |         | NS                                                                                                     | <i>Z. mays</i> PCO147721 mRNA<br><a href="#">AY104598</a>                                                          | 5exp-3  |
| T.C. 27Bcob | NA     |         | 146 | 6    | NS                                                                                                       |         | <i>Streptomyces avermitilis</i> putative GTP-binding protein<br><a href="#">BAC73307</a>               | 4 exp-5<br><i>Streptomyces avermitilis</i> complete genome<br><a href="#">BA000030</a>                             | 9exp-7  |
| T.C. 27Bcob | NA     |         | 149 | 1    | NS                                                                                                       |         | <i>Leifsonia xyli</i> cell division membrane protein<br><a href="#">YP_061233</a>                      | 6exp-6<br><i>Leifsonia xyli</i> cell division membrane protein<br><a href="#">YP_061233</a>                        | 1exp-7  |
| T.C. 7D cob | NA     |         | 126 | D.S. | <i>Streptomyces viridochromogenes</i> Avilamycin A biosynthetic gene cluster<br><a href="#">AF333038</a> | 5exp-6  | <i>Streptomyces viridochromogenes</i> putative NDP-glucose 4,6-dehydratase<br><a href="#">AAK83183</a> | 2exp-8<br><i>Streptomyces viridichromogenes</i> Avilamycin A biosynthetic gene cluster<br><a href="#">AF333038</a> | 1exp-10 |
| LH38        | kernel | Morocho | 169 | 1    | NS                                                                                                       |         | NS                                                                                                     | NS                                                                                                                 |         |
| LH35        | kernel | Capia   | 207 | D.S. | NS                                                                                                       |         | NS                                                                                                     | NS                                                                                                                 |         |
| P.C.13B     | cob    | Capia   | 156 | D.S. | NS                                                                                                       |         | NS                                                                                                     | NS                                                                                                                 |         |
| P.C.52      | cob    | NI      | 160 | D.S. | NS                                                                                                       |         | NS                                                                                                     | NS                                                                                                                 |         |

---

Figure S1. Allele sequences of locus *phi127* from archaeological and extant maize specimens. Clones (c) and direct sequencing (ds) products corresponding to archaeological specimens are highlighted in gray. *Z.m.p.*: *Zea mays ssp parviglumis*; *Z.m.m.*: *Zea mays ssp mexicana*.

Figure S2. Allele sequences of locus *phi029* from archaeological and extant maize specimens. Clones (c) and direct sequencing (ds) products corresponding to archaeological specimens are highlighted in gray. *Z.m.p.*: *Zea mays ssp parviglumis*; *Z.m.m.*: *Zea mays ssp mexicana*.
