# Supplementary material
Source: PubMed Central journal article supplement (PMC1766387)
Supplement: rspb20063747s13.pdf [file rspb20063747s13.pdf]

10 20 30 40 50 60 70 80 90 100 110 120  
 Allele 126 ATATGCATTGCCTGGAAC TGAAGGATGCTGTCTGTCTGTCTGTCTGTCTCTTTGTTTGTTCACGATGCAGATTTGTTCAATTTCCAGTGCCCGGCACTACACTCGGGAGGCGTGTTTGAATT  
 Allele 124 ATATGCATTGCCTGGAAC TGAAGGATGCTGTCTGTCTGTCTGTCTGTCTCTTTGTTTGTTCACGATGCAGATTTGTTCAAT--TCCAGTGCCCGGCAATACACTCGGGAGGCGTGTTTGAATT  
 Allele 120 ATATGCATTGCCTGGAAC TGAAGGATGTCAGTCTGTCTGTCTGTCTCTTTGTTTGTTCAGATGCAGATTTGTTCAAT--TCCAGTGCCCGGCACTACACTCGGGAGGCGTGTTTGAATT  
 Allele 114 ATATGCATTGCCTGGAAC TGAAGGATGCTGTCTGTCTCTTTGTTTGTTCACGATGCAGATTTGTTCAATTTCCAGTGCCCGGCACTACACTCGGGAGGCGTGTTTGAATT

Allele 112 ATATGCATTGCCTGGAAC TGAAGGATGCTGTCTGTCTCTTTGTTTGTTCACGATGCAGATTTGTTCAAT--TCCAGTGCCCGGCACTACACTCGGGAGGCGTGTTTGAATT

|           |                                                                            |
|-----------|----------------------------------------------------------------------------|
| LH40 c1   | . . . . . T . . . T . . . . . TT . C . . . . .                             |
| P.C.51 ds | . . . . . T . . . . .                                                      |
| P.C.51 c1 | . . . . . T . . . . . A . . . . .                                          |
| P.C.51 c2 | . . . . . T . . . . . ~ A . . . . .                                        |
| P.C.51 c3 | . . . . . T . . . . . ~ A . . . . .                                        |
| P.C.51 c4 | . . . . . C . . . . . T . . . . . A . . . . .                              |
| P.C.51 c5 | . . . . . A . . . . .                                                      |
| T.C.7 ds  | . . . . .                                                                  |
| T.C.7 c1  | . . . . . A . . . . .                                                      |
| T.C.7 c2  | . . . . .                                                                  |
| T.C.7 c3  | . . . . .                                                                  |
| T.C.7 c4  | . . . . . A . . . . .                                                      |
| T.C.54 ds | . . . . .                                                                  |
| T.C.54 c1 | . . . . .                                                                  |
| T.C.54 c2 | . . . . .                                                                  |
| T.C.54 c3 | . . . . .                                                                  |
| T.C.54 c4 | . . . . .                                                                  |
| T.C.54 c5 | . . . . .                                                                  |
| T.C.54 c6 | . . . . .                                                                  |
| T.C.54 c7 | . . . . .                                                                  |
| LH20 c1   | . . . . . C . . . . . TC . A . . . G . . . . . A . . . . . G . G . . . . . |
| LH20 c2   | . . . . . A . . . . .                                                      |
| LH20 c3   | . . . . .                                                                  |
| LH20 c4   | . . . . .                                                                  |
| LH20 c5   | . . . . .                                                                  |
| LH22 c1   | . . . . . T . . . . . T . A . . . . .                                      |
| LH22 c2   | . . . . . C . . . . .                                                      |
| LH38 ds   | . . . . .                                                                  |
| LH39 ds   | . . . . .                                                                  |
| LH39 c1   | . . . . .                                                                  |
| LH39 c2   | . . . . . A . . . . . T . . . . .                                          |
| LH39 c3   | . . . . .                                                                  |
| LH39 c4   | . . . . . T . . . . . A . . . . . A . . . . .                              |
| LH39 c5   | . . . . .                                                                  |
| P.C.52 ds | . . . . . G . . . . .                                                      |
| P.C.52 c1 | . . . . .                                                                  |
| P.C.52 c2 | . . . . . C . . . . .                                                      |
| P.C.52 c3 | . . . . .                                                                  |
| P.C.52 c4 | . . . . .                                                                  |
| P.C.52 c5 | . . . . .                                                                  |
| P.C.52 c6 | . . . . .                                                                  |
| P.C.52 c7 | . . . . .                                                                  |
| P.C.52 c8 | . . . . .                                                                  |

Allele 112 - *Z.m.p.* ATATGCATTGCCTGGAAC TGAAGGATGCTGTCTGCCT~::~::~::~CTTGTGTTTGTTCACGATGCAGATTTGTTCAAT--TCCAGTGCCCGGCAATACACTCGGGAGGCGTGTTTGAATT  
 Allele 112 - *Z.m.m.* ATATGCATTGCCTGGAAC TGAAGGATGCTGTCTGCCT~::~::~::~CTTGTGTTTGTTCACGATGCAGATTTGTTCAAT--TCCAGTGCCCGGCAATACACTCGGGAGGCGTGTTTGAATT
